# Supplementary material
Source: PubMed Central journal article supplement (PMC3374369)
Supplement: 97320630008407S1.pdf [file 97320630008407S1.pdf]

## Supplementary material:

**Table1:** solvent accessible surface area (SASA). SASA of  $\omega$ -loop (residue 1 to 11 of GLA domain) has been evaluated in the presence and in the absence of Ca<sup>2+</sup>.

| Number | Residue | SASA- Ca | SASA+ Ca |
|--------|---------|----------|----------|
| 1      | ALA     | 59.47    | 37.14    |
| 2      | GLY     | 51.82    | 49.39    |
| 3      | SER     | 93.87    | 93.41    |
| 4      | TYR     | 176.50   | 167.85   |
| 5      | LEU     | 36.39    | 149.10   |
| 6      | LEU     | 76.77    | 156.18   |
| 7      | GLA     | 117      | 79.95    |
| 8      | GLA     | 156.39   | 53.61    |
| 9      | LEU     | 142.56   | 133.26   |
| 10     | PHE     | 125.77   | 154.40   |
| 11     | GLA     | 164.66   | 142.75   |
